# Supplementary material for: Mutational analysis of a phenazine biosynthetic gene cluster in Streptomyces anulatus 9663
Source: PubMed Central journal article supplement (PMC3326630; doi:10.3762/bjoc.8.57), 2012-04-04
Supplement: Beilstein_J_Org_Chem-08-501-s001.pdf [file Beilstein_J_Org_Chem-08-501-s001.pdf]

## Supporting Information

for

### **Mutational analysis of a phenazine biosynthetic gene cluster in *Streptomyces anulatus* 9663**

Orwah Saleh<sup>1</sup>, Katrin Flinspach<sup>1</sup>, Lucia Westrich<sup>1</sup>, Andreas Kulik<sup>2</sup>, Bertolt Gust<sup>1</sup>,  
Hans-Peter Fiedler<sup>2</sup> and Lutz Heide<sup>\*1</sup>

Address: <sup>1</sup>Pharmaceutical Institute, University of Tübingen, Auf der Morgenstelle 8,  
72076 Tübingen, Germany and <sup>2</sup>Institute of Microbiology and Infection Medicine,  
University of Tübingen, Auf der Morgenstelle 28, 72076 Tübingen, Germany

Email: Lutz Heide - heide@uni-tuebingen.de

\*Corresponding author

§Fax: +497071295250

**Analytical data, complete list of genes in cosmid ppzOS04, and PCR primers**

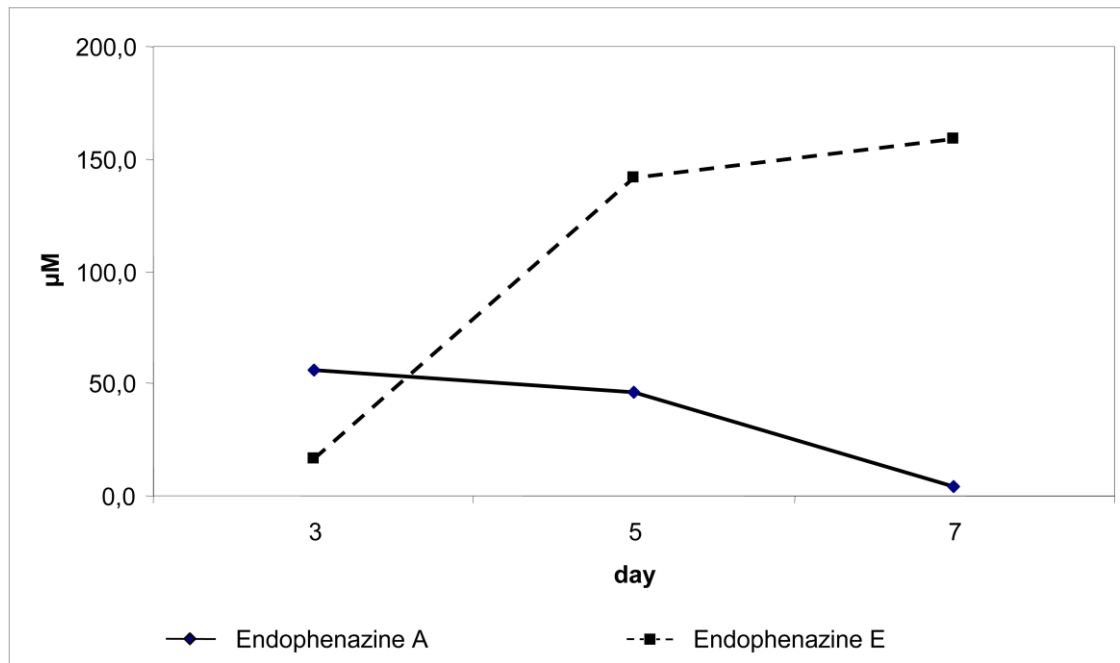

**Figure S1:** Production of endophenazine A and endophenazine E by *S. coelicolor* M512(ppzOS04) after cultivation for 3, 5 and 7 days in 24 deep-well plates.

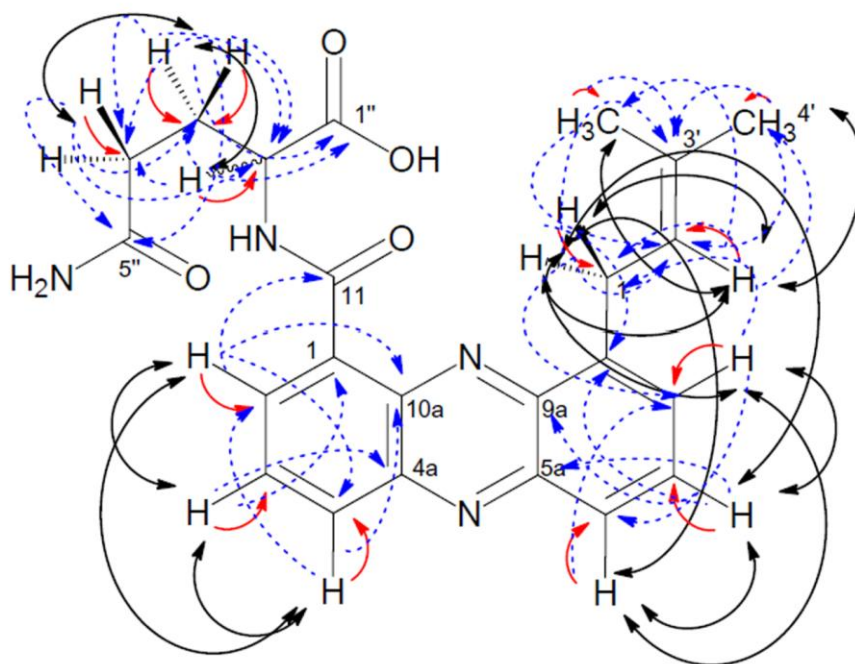

**Figure S2:**  $^1\text{H}$ - $^1\text{H}$  COSY ( $\leftrightarrow$ ), HSQC ( $\rightarrow$ ) and HMBC ( $-\cdot-\cdot-$ ) correlations from 2D NMR experiments for endophenazine E.

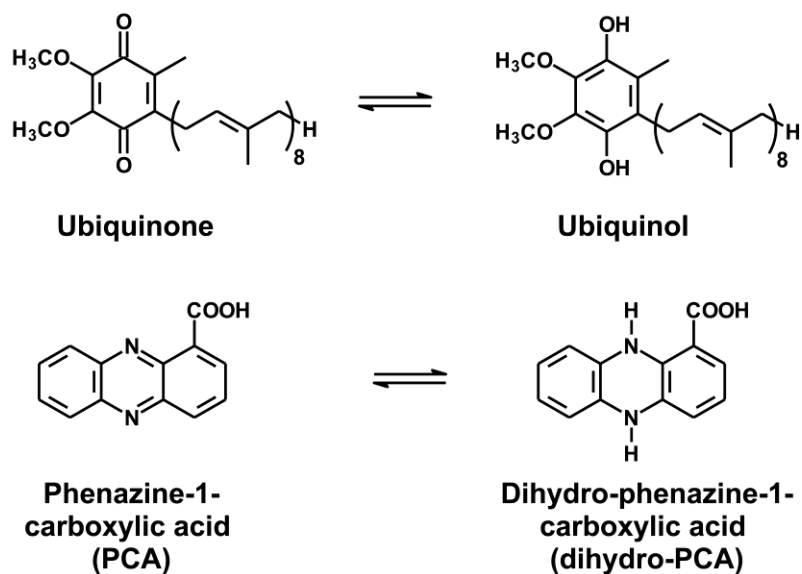

**Figure S3:** Reduction of ubiquinone to ubiquinol, catalyzed by cytochrome d ubiquinol oxidase, and reduction of phenazine-1-carboxylic acid to dihydro-phenazine-1-carboxylic acid, possibly catalyzed by PpzZ1/PpzZ2 of the endophenazine biosynthetic gene cluster of *Streptomyces anulatus* 9663.

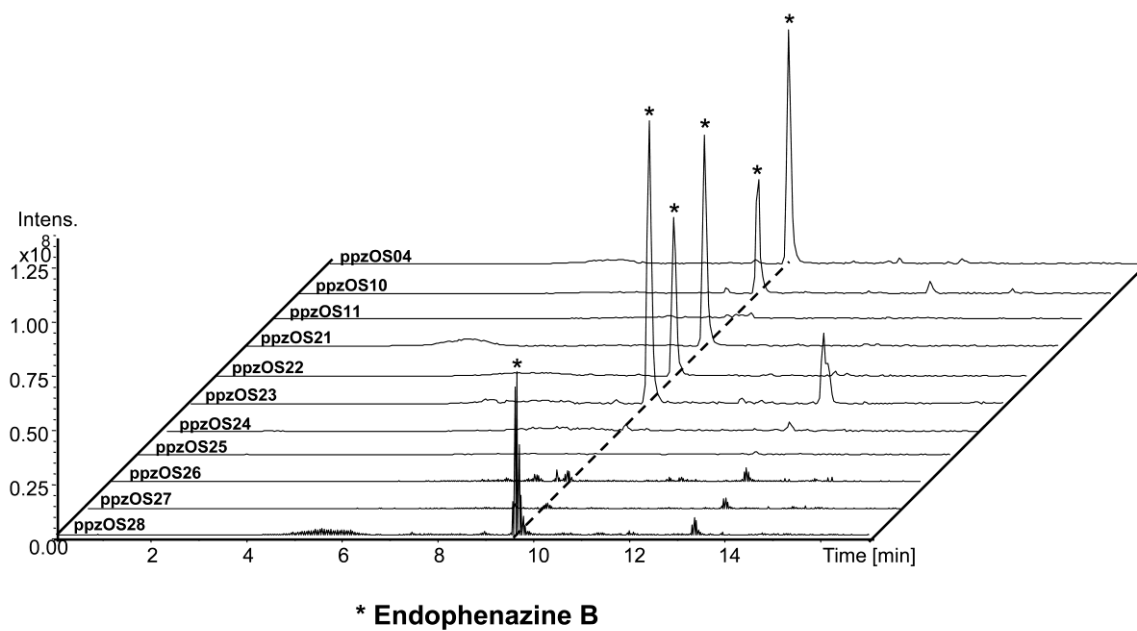

**Figure S4:** Extracted ion chromatograms for the mass of endophenazine B ( $[M + H]^+ = 323$ ) for the heterologous host *S. coelicolor* M512 with the cosmid ppzOS04 carrying the intact phenazine biosynthetic gene cluster from *S. anulatus* and the heterologous host with the constructs ppzOS10-11 and ppzOS21-28.

**Table S1:** Genes identified on cosmid ppzOS04 from *S. anulatus* 9663.

| Gene        | aa  | Proposed function                                        | Orthologue identified by BLAST search                                | Identity/<br>Similarity<br>% | Acc. Number  |
|-------------|-----|----------------------------------------------------------|----------------------------------------------------------------------|------------------------------|--------------|
| <i>orf1</i> | 333 | serine protease                                          | putative serine protease, <i>Streptomyces roseosporus</i> NRRL 15998 | 93/98                        | ZP_04708306  |
| <i>orf2</i> | 342 | aspartate-semialdehyde dehydrogenase                     | ASD2, <i>Streptomyces griseus</i> subsp. griseus NBRC 13350          | 97/99                        | YP_001826399 |
| <i>orf3</i> | 115 | putative transcriptional modulator                       | <i>Streptomyces roseosporus</i> NRRL 11379                           | 71/87                        | ZP_04708308  |
| <i>orf4</i> | 870 | aminopeptidase N                                         | <i>Streptomyces griseus</i> subsp. griseus NBRC 13350                | 98/99                        | YP_001826397 |
| <i>ppzP</i> | 299 | prenyltransferase                                        | EpzP, <i>Streptomyces cinnamomensis</i>                              | 57/71                        | ADQ43372     |
| <i>mk</i>   | 345 | mevalonate kinase                                        | MK, <i>Streptomyces cinnamomensis</i>                                | 76/87                        | ADQ43373     |
| <i>mdpd</i> | 351 | diphosphomevalonate decarboxylase                        | <i>Streptomyces</i> sp. CL190                                        | 77/84                        | BAB07791     |
| <i>pmk</i>  | 371 | phosphomevalonate kinase                                 | <i>Streptomyces</i> sp. CL190                                        | 72/80                        | BAB07792     |
| <i>ippi</i> | 363 | isopentenyl-diphosphate delta-isomerase                  | <i>Streptomyces</i> sp. CL190                                        | 79/88                        | Q9KWG2       |
| <i>hmgr</i> | 353 | 3-hydroxy-3-methylglutaryl coenzyme A reductase          | HMGR, <i>Streptomyces cinnamomensis</i>                              | 89/94                        | ADQ43377     |
| <i>hmgs</i> | 391 | 3-hydroxy-3-methylglutaryl CoA synthase                  | LPMA, <i>Streptomyces</i> sp. SN-1061M                               | 85/92                        | ADC96649     |
| <i>ppzT</i> | 327 | putative acetoacetyl-CoA synthase                        | <i>Streptomyces</i> sp. KO-3988                                      | 79/87                        | BAD86806     |
| <i>ppzU</i> | 221 | flavodoxin                                               | flavoprotein WrbA, <i>Streptomyces violaceusniger</i> Tü 4113        | 63/79                        | YP_004814680 |
| <i>ppzV</i> | 206 | putative TetR-family regulator                           | EpzV, <i>Streptomyces cinnamomensis</i>                              | 64/76                        | ADQ43382     |
| <i>ppzM</i> | 340 | N-methyltransferase                                      | EpzM, <i>Streptomyces cinnamomensis</i>                              | 77/86                        | ADQ43384     |
| <i>ppzA</i> | 168 | phenazine biosynthesis                                   | EpzA2, <i>Streptomyces cinnamomensis</i>                             | 83/88                        | ADQ43385     |
| <i>ppzG</i> | 233 | FMN-dependent oxidase                                    | EphzG, <i>Streptomyces cinnamomensis</i>                             | 68/77                        | CAL34111     |
| <i>ppzF</i> | 279 | <i>trans</i> 2,3-dihydro 3-hydroxyanthranilate isomerase | EpzF, <i>Streptomyces cinnamomensis</i>                              | 87/94                        | ADQ43387     |
| <i>ppzE</i> | 646 | 2-amino-2-desoxy-isochorismate synthase                  | EphzE, <i>Streptomyces cinnamomensis</i>                             | 82/87                        | CAL34110     |
| <i>ppzD</i> | 207 | 2,3-dihydro-3-hydroxy-anthranilate (DHHA) synthase       | EphzD, <i>Streptomyces cinnamomensis</i>                             | 85/92                        | CAL34109     |
| <i>ppzC</i> | 392 | 3-deoxy-D-arabino-heptulosonic acid 7-phosphate synthase | EphzC, <i>Streptomyces cinnamomensis</i>                             | 82/89                        | CAL34108     |
| <i>ppzB</i> | 162 | phenazine biosynthesis                                   | EphzB, <i>Streptomyces cinnamomensis</i>                             | 83/88                        | CAL34107     |
| <i>ppzK</i> | 419 | FAD-dependent oxidoreductase                             | FAD-dependent pyridine nucleotide-disulfide oxidoreductase           | 55/66                        | YP_295688    |
| <i>ppzL</i> | 107 | ferredoxin                                               | ferredoxin, <i>Rhodopseudomonas palustris</i> HaA2                   | 55/68                        | YP_487220    |
| <i>ppzY</i> | 290 | transcriptional regulator                                | transcriptional regulator, <i>Streptomyces lividans</i> TK24         | 61/74                        | ZP_06530228  |

|              |     |                                            |                                                                                         |       |              |
|--------------|-----|--------------------------------------------|-----------------------------------------------------------------------------------------|-------|--------------|
| <i>ppz1</i>  | 430 | cytochrome d ubiquinol oxidase, subunit I  | cytochrome d ubiquinol oxidase, subunit I, <i>Stackebrandtia nassauensis</i> DSM 44728  | 54/66 | YP_003509915 |
| <i>ppz2</i>  | 344 | cytochrome d ubiquinol oxidase, subunit II | cytochrome d ubiquinol oxidase, subunit II, <i>Stackebrandtia nassauensis</i> DSM 44728 | 48/60 | YP_003509914 |
| <i>ppzR1</i> | 563 | ABC transporter                            | cysteine ABC transporter permease, <i>Thermobispora bispora</i> DSM 43833               | 55/68 | YP_003653341 |
| <i>ppzR2</i> | 585 | ABC transporter                            | cysteine ABC transporter permease, <i>Streptosporangium roseum</i> DSM 43021            | 52/65 | YP_003338959 |
| <i>orf12</i> | 384 | allantoicase                               | putative allantoicase, <i>Streptomyces griseus</i> subsp. <i>griseus</i> NBRC 13350     | 98/99 | YP_001826394 |

**Table S2:** Sequences of the primers used to construct the cosmids ppzOS10, ppzOS11 and ppzOS21-28.

| <b>Cosmid</b> | <b>Primer</b>  | <b>Sequence</b>                                                                                 |
|---------------|----------------|-------------------------------------------------------------------------------------------------|
| ppzOS10       | 18A9_L_for     | 5'-GCC AAG CAG GGC AAG CCC GCC CAC GAG TTC TCG GTG<br>AAG TCT AGA ATT CCG GGG ATC CGT CGA CC-3' |
|               | 18A9_L_rev     | 5'-CTA CGC GGT GGC CGC CGC CGC GTC CGC CGC CCG<br>GGC CTT ACT AGT TGT AGG CTG GAG CTG CTT C-3'  |
| ppzOS11       | 18A9_R_for     | 5'-CGG AAT TCG TTA CTC CAG TCG CGT GCG TGT GTC GTC<br>GGT TCT AGA ATT CCG GGG ATC CGT CGA CC-3' |
|               | 18A9_R_rev     | 5'-TTC GGC TGA GCT GAA AGA TAT CTG CGA AAA CTT TCG<br>ATG ACT AGT TGT AGG CTG GAG CTG CTT C-3'  |
| ppzOS21       | 18A9_fOrf2_for | 5'-GCC AAG CAG GGC AAG CCC GCC CAC GAG TTC TCG GTG<br>AAG TCT AGA ATT CCG GGG ATC CGT CGA CC-3' |
|               | 18A9_fOrf2_rev | 5'-CCG GAG CCG GAC ACC GCC TGG TAG GAG GCG ACG<br>GTC AGC ACT AGT TGT AGG CTG GAG CTG CTT C-3'  |
| ppzOS22       | 18A9_fOrf4_for | 5'-CGG AAT TCG TTA CTC CAG TCG CGT GCG TGT GTC GTC<br>GGT TCT AGA ATT CCG GGG ATC CGT CGA CC-3' |
|               | 18A9_fOrf4_rev | 5'-CGC CAT GAT CGG GTG CGT GGA GGG CAG CTG GTC CTG<br>CCG ACT AGT TGT AGG CTG GAG CTG CTT C-3'  |
| ppzOS23       | Knock_ppz2_F   | 5'-CCC CGT TTT CCC GTT CAC TTC TTC CCA GAG GGG GGC<br>ATG TCT AGA ATT CCG GGG ATC CGT CGA CC-3' |
|               | Knock_ppz2_R   | 5'-GCG CCA CAG GCG CCG GCC CCG GTG TCG TCT TGA CGG<br>TCT ACT AGT TGT AGG CTG GAG CTG CTT C-3'  |
| ppzOS24       | Knock_ppz3_F   | 5'-GGC CGG CGC CTG TGG CGC CGG CCC CGG CCG AGA<br>CCG ATG TCT AGA ATT CCG GGG ATC CGT CGA CC-3' |
|               | Knock_ppz3_R   | 5'-ACG GCA CTC CGG GCC GCT CGG AGT TCG ACA TAG AGG<br>AAC ACT AGT TGT AGG CTG GAG CTG CTT C-3'  |
| ppzOS25       | Knock_ppz4_F   | 5'-CAT CAC TGG AAC AGG TCA TCT CAT GAA GGA GAC TCC<br>ATG TCT AGA ATT CCG GGG ATC CGT CGA CC-3' |
|               | Knock_ppz4_R   | 5'-CCA CGT TCG TCG GCA CGA GTC TGT GGC GGG GCA GCC<br>TGG ACT AGT TGT AGG CTG GAG CTG CTT C-3'  |
| ppzOS26       | Knock_ppzM_F   | 5'-CCC GCC CGC CCG CAC CCG CCC ATG AGG AGA CAG<br>GCC ATG TCT AGA ATT CCG GGG ATC CGT CGA CC-3' |
|               | Knock_ppzM_R   | 5'-GGC GGG AGG ATC CGG TCG CCG GCC GTC GGC ACG<br>TCA TGG ACT AGT TGT AGG CTG GAG CTG CTT C-3'  |
| ppzOS27       | 18A9_fppz8_F   | 5'-CCT CAC CGA CTT CCA AGC GCT GCT CAC CAA CTC CAG<br>CGC TCT AGA ATT CCG GGG ATC CGT CGA CC-3' |
|               | 18A9_fppz8_R   | 5'-TTC GGC TGA GCT GAA AGA TAT CTG CGA AAA CTT TCG<br>ATG ACT AGT TGT AGG CTG GAG CTG CTT C-3'  |
| ppzOS28       | 18A9_fOrf5_F   | 5'-GCA TCA GGC CCG GGT CGT GGG CGA GAT GGC GGA<br>CGC CCA TCT AGA ATT CCG GGG ATC CGT CGA CC-3' |
|               | 18A9_fOrf5_R   | 5'-TTC GGC TGA GCT GAA AGA TAT CTG CGA AAA CTT TCG<br>ATG ACT AGT TGT AGG CTG GAG CTG CTT C-3'  |
